# Supplementary material for: AhR-Mediated Effects of Dioxin on Neuronal Acetylcholinesterase Expression in Vitro
Source: PubMed Central journal article supplement (PMC3673198; doi:10.1289/ehp.1206066), 2013-02-20
Supplement: ehp.1206066.s001.pdf [file ehp.1206066.s001.pdf]

## **Supplemental Material**

### **AhR-Mediated Effects of Fioxin on Neuronal Acetylcholinesterase Expression in Vitro**

Heidi Qunhui Xie, Hai-Ming Xu, Hua-Ling Fu, Qin Hu, Wen-Jing Tian, Xin-Hui Pei and Bin  
Zhao

## Table of Contents

|                                  |   |
|----------------------------------|---|
| Supplemental Material, Figure S1 | 3 |
| Supplemental Material, Figure S2 | 4 |
| Supplemental Material, Figure S3 | 5 |
| Supplemental Material, Table S1  | 6 |

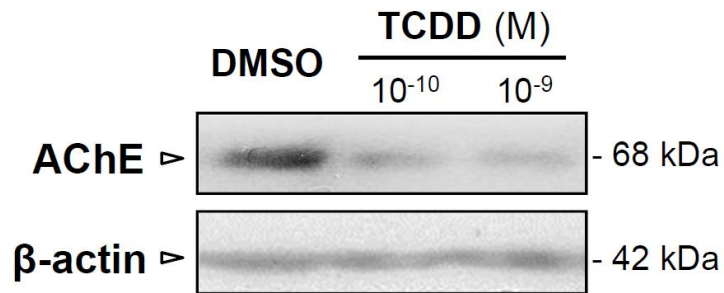

**Supplemental Material, Figure S1:** Change in AChE protein upon TCDD treatment. The protein level of AChE was determined by Western blot assay. Cultures of SK-N-SH were treated with TCDD ( $10^{-10}$  ~  $10^{-9}$  M) or DMSO (0.1%) for 24 hours. After the treatment, the cultures were collected immediately in lysis buffer containing 125 mM Tris-HCl (pH 6.8), 2% SDS, 10% glycerol and 200 mM 2-mercaptoethanol, and the proteins were subjected to 8% SDS-PAGE electrophoresis. After transfer, the membrane was incubated with anti-AChE antibody (1: 1000; Santa Cruz, Santa Cruz, CA) and anti-β actin antibody (1: 10000; Sigma) at 4 °C for 16 hours for the protein detection. The immuno-complexes were visualized by the enhanced chemiluminescence (ECL) method (Millipore, Billerica, MA). An obvious reduction of AChE protein was observed,  $n=3$ .

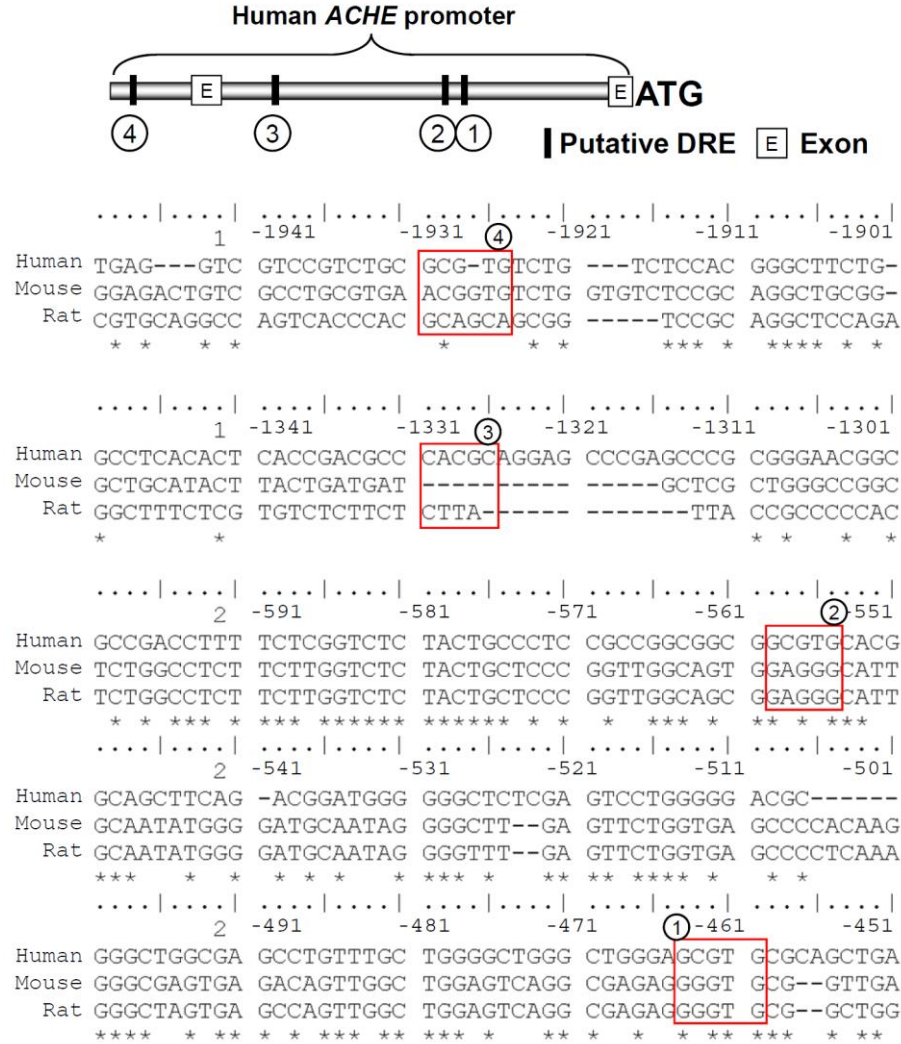

**Supplemental Material, Figure S2:** Sequence of the putative DRE sites on the promoter region of human (NC\_000007) *ACHE* and the alignments with the corresponding mouse (NC\_000071) and rat (NC\_005111) *ACHE* promoter sequences are shown. The promoter sequences are distinct among different species and an absence of the DRE consensus sequence is observed in mouse and rat.

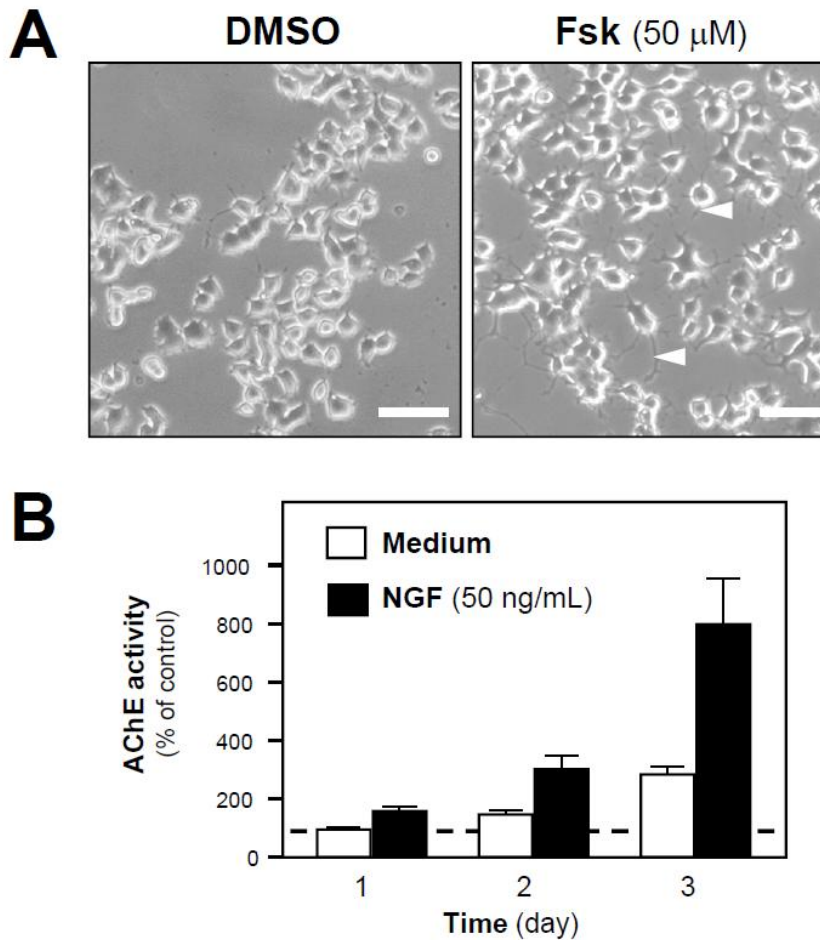

**Supplemental Material, Figure S3:** Responsiveness of the cultured PC12 cells to chemicals. (A) Cultured PC12 cells were treated with forskolin (Fsk) at 50  $\mu$ M for 72 hours. The treated cells were fixed with ice-cold 4% paraformaldehyde and the extension of neurites was observed as pointed by arrows. Bar = 50  $\mu$ m. (B) Cultured PC12 cells were treated with nerve growth factor (NGF) at 50 ng/mL. Cell lysates were collected at indicated time points to determine the activity of AChE by Ellman assay. An obvious increase in AChE activity was observed after NGF treatment.

| Dioxins         | TEF(WHO) | Concentration        | AChE activity<br>(% of Control) | <i>p</i> Value<br>(Compared to control) |
|-----------------|----------|----------------------|---------------------------------|-----------------------------------------|
| 2,3,7,8-TCDF    | 0.1      | 10 <sup>-8</sup> M   | 73.8±6.1                        | 0.02                                    |
| 2,3,4,7,8-PeCDF | 0.3      | 3x10 <sup>-9</sup> M | 67.8±2.6                        | 0.009                                   |

**Supplemental Material, Table S1:** Effects of other dioxins on AChE activity in SK-N-SH cells. Cultured SK-N-SH cells were treated with 2,3,7,8-tetrachlorodibenzofuran (TCDF) (Wellington, Ontario, Canada) at 10<sup>-8</sup> M or 2,3,4,7,8-pentachloro- dibenzofuran (PeCDF) (Wellington, Ontario, Canada) at 3x10<sup>-9</sup> M or solvent alone (Control) at 0.01% for 24 hours. Enzymatic activity of AChE was determined as described in Materials and Methods. Values are calculated as % of solvent alone (Control) and expressed as mean±SEM, *n*=3, each independent sample was tested in triplicate. Bonferroni test was used for means comparisons between solvent control and dioxin treatment; *p* values were obtained by one-way ANOVA with Bonferroni test compared with solvent-treated cells.
